# Supplementary material
Source: PubMed Central journal article supplement (PMC4793661)
Supplement: bini017587.ww1_default.pdf [file bini017587.ww1_default.pdf]

**Appendix 1:** Supplementary tables [posted as supplied by author]

**Table A: Number of states with any tobacco ban, and type of ban by year from 2001-2011, and crude tobacco related mortality rate per 100,000 (types of bans are not mutually exclusive)**

| Year             | No ban           |                    | Any ban*         |                    | Tobacco free indoors |                    | Tobacco or smoke free outdoors† |                    |
|------------------|------------------|--------------------|------------------|--------------------|----------------------|--------------------|---------------------------------|--------------------|
|                  | Number of states | Deaths per 100,000 | Number of states | Deaths per 100,000 | Number of states     | Deaths per 100,000 | Number of states                | Deaths per 100,000 |
| 2001             | 25               | 115.8              | 25               | 111.1              | 21                   | 124.4              | 16                              | 135.9              |
| 2002             | 22               | 122.4              | 28               | 102.7              | 24                   | 111.2              | 19                              | 100.7              |
| 2003             | 20               | 129.9              | 30               | 116.4              | 25                   | 116.5              | 20                              | 99.2               |
| 2004             | 18               | 130.4              | 32               | 103.4              | 27                   | 111.5              | 22                              | 96.0               |
| 2005             | 16               | 137.2              | 34               | 105.1              | 30                   | 102.9              | 24                              | 91.7               |
| 2006             | 13               | 126.4              | 37               | 105.2              | 32                   | 107.6              | 26                              | 99.9               |
| 2007             | 9                | 143.9              | 41               | 100.7              | 35                   | 100.1              | 28                              | 105.7              |
| 2008             | 6                | 150.1              | 44               | 109.4              | 38                   | 107.9              | 32                              | 104.5              |
| 2009             | 5                | 128.7              | 45               | 114.5              | 40                   | 106.6              | 35                              | 102.1              |
| 2010             | 3                | 114.6              | 47               | 114.2              | 43                   | 107.3              | 38                              | 98.4               |
| 2011             | 2                | 148.6              | 48               | 124.2              | 44                   | 115.3              | 39                              | 113.3              |
| <b>2001-2011</b> |                  | <b>128.9</b>       |                  | <b>110.4</b>       |                      | <b>109.1</b>       |                                 | <b>103.7</b>       |

\*All states which had any ban had a smoke-free indoors ban

† States which were tobacco free outdoors were also smoke free outdoors

**Table B. The association between any state prison system smoking ban and smoking related deaths adjusted for gender, calendar year and state general population smoking related death rates (Model 1). The association between year since ban and smoking related deaths, adjusted for sex, calendar year, and state general population smoking related death rates (Model 2).\*\***

|                                                            | Incidence rate ratio | 95% confidence interval |
|------------------------------------------------------------|----------------------|-------------------------|
| <b>Model 1</b>                                             |                      |                         |
| <b>All smoking related causes of death</b>                 |                      |                         |
| Any ban                                                    | 0.94                 | 0.94 to 1.02            |
| Calendar year                                              | 1.01                 | 1.01 to 1.02            |
| Men                                                        | 1.27                 | 1.15 to 1.38            |
| State population smoking related death rate                | 1.00                 | 1.00 to 1.00            |
| <b>Smoking related cancer deaths</b>                       |                      |                         |
| Any ban                                                    | 1.02                 | 0.96 to 1.10            |
| Calendar year                                              | 1.04                 | 1.02 to 1.05            |
| Men                                                        | 1.38                 | 1.17 to 1.64            |
| State population smoking related cancer death rate         | 1.02                 | 1.02 to 1.02            |
| <b>Smoking related cardiovascular deaths</b>               |                      |                         |
| Any ban                                                    | 0.96                 | 0.91 to 1.00            |
| Calendar year                                              | 1.00                 | 1.00 to 1.01            |
| men                                                        | 1.21                 | 1.08 to 1.36            |
| State population smoking related cardiovascular death rate | 1.01                 | 1.01 to 1.01            |
| <b>Smoking related pulmonary deaths</b>                    |                      |                         |
| Any ban                                                    | 0.70                 | 0.61 to 0.82            |
| Calendar year                                              | 1.04                 | 1.02 to 1.06            |
| Men                                                        | 1.01                 | 0.79 to 1.30            |
| State population smoking related pulmonary death rate      | 1.03                 | 1.01 to 1.04            |
| <b>Model 2</b>                                             |                      |                         |
| <b>All smoking related causes of death</b>                 |                      |                         |
| Years since ban, categorized                               |                      |                         |
| 0                                                          | ref                  |                         |
| >0 and <4                                                  | 0.98                 | 0.94 to 1.02            |
| ≥4 and <9                                                  | 0.98                 | 0.94 to 1.02            |
| ≥9                                                         | 0.97                 | 0.92 to 1.02            |
| Calendar year                                              | 1.01                 | 1.01 to 1.02            |
| Men                                                        | 1.26                 | 1.15 to 1.38            |
| State population smoking related death rate                | 1.00                 | 1.00 to 1.01            |
| <b>Smoking related cancer deaths</b>                       |                      |                         |
| Years since ban, categorized                               |                      |                         |
| 0                                                          | ref                  |                         |
| >0 and <4                                                  | 0.99                 | 0.91 to 1.08            |
| ≥4 and <9                                                  | 1.00                 | 0.92 to 1.09            |
| ≥9                                                         | 0.89                 | 0.81 to 0.98            |

|                                                            |      |              |
|------------------------------------------------------------|------|--------------|
| Calendar year                                              | 1.04 | 1.03 to 1.06 |
| Men                                                        | 1.40 | 1.18 to 1.66 |
| State population smoking related cancer death rate         | 1.02 | 1.02 to 1.02 |
| <b>Smoking related cardiovascular deaths</b>               |      |              |
| Years since ban, categorized                               |      |              |
| 0                                                          | ref  |              |
| >0 and <4                                                  | 1.01 | 0.95 to 1.07 |
| ≥4 and <9                                                  | 1.00 | 0.94 to 1.05 |
| ≥9                                                         | 1.06 | 1.00 to 1.13 |
| Calendar year                                              | 1.00 | 0.99 to 1.00 |
| Men                                                        | 1.19 | 1.07 to 1.34 |
| State population smoking related cardiovascular death rate | 1.01 | 1.01 to 1.01 |
| <b>Smoking related pulmonary deaths</b>                    |      |              |
| Years since ban, categorized                               |      |              |
| 0                                                          | ref  |              |
| >0 and <4                                                  | 0.72 | 0.60 to 0.87 |
| ≥4 and <9                                                  | 0.83 | 0.70 to 0.99 |
| ≥9                                                         | 0.67 | 0.55 to 0.82 |
| Calendar year                                              | 1.05 | 1.02 to 1.07 |
| Men                                                        | 1.01 | 0.79 to 1.29 |
| State population smoking related pulmonary death rate      | 1.03 | 1.02 to 1.04 |

---

**Table C: The association between any state prison system smoking ban and other deaths (not in 19 smoking related cause categories) adjusted for sex, calendar year and state general population smoking prevalence (Model 1). The association between year since ban and other deaths, adjusted for sex, calendar year, and state general population smoking prevalence (Model 2).**

|                                        | <b>Incidence rate ratio</b> | <b>95% confidence interval</b> |
|----------------------------------------|-----------------------------|--------------------------------|
|                                        | <b>Model 1</b>              |                                |
| Any ban                                | 1.05                        | 1.00 to 1.09                   |
| Calendar year                          | 1.00                        | 1.00 to 1.01                   |
| Men                                    | 1.59                        | 1.49 to 1.70                   |
| State population prevalence of smoking | 1.00                        | 1.00 to 1.01                   |
|                                        | <b>Model 2</b>              |                                |
| Years since ban, categorized           |                             |                                |
| 0                                      | ref                         |                                |
| >0 and <4                              | 1.08                        | 1.04 to 1.13                   |
| ≥4 and <9                              | 1.08                        | 1.03 to 1.12                   |
| ≥9                                     | 1.03                        | 0.98 to 1.08                   |
| Calendar year                          | 1.00                        | 1.00 to 1.01                   |
| Men                                    | 1.59                        | 1.48 to 1.70                   |
| State population prevalence of smoking | 1.00                        | 1.00 to 1.01                   |
