# Supplementary material
Source: PubMed Central journal article supplement (PMC4793661)

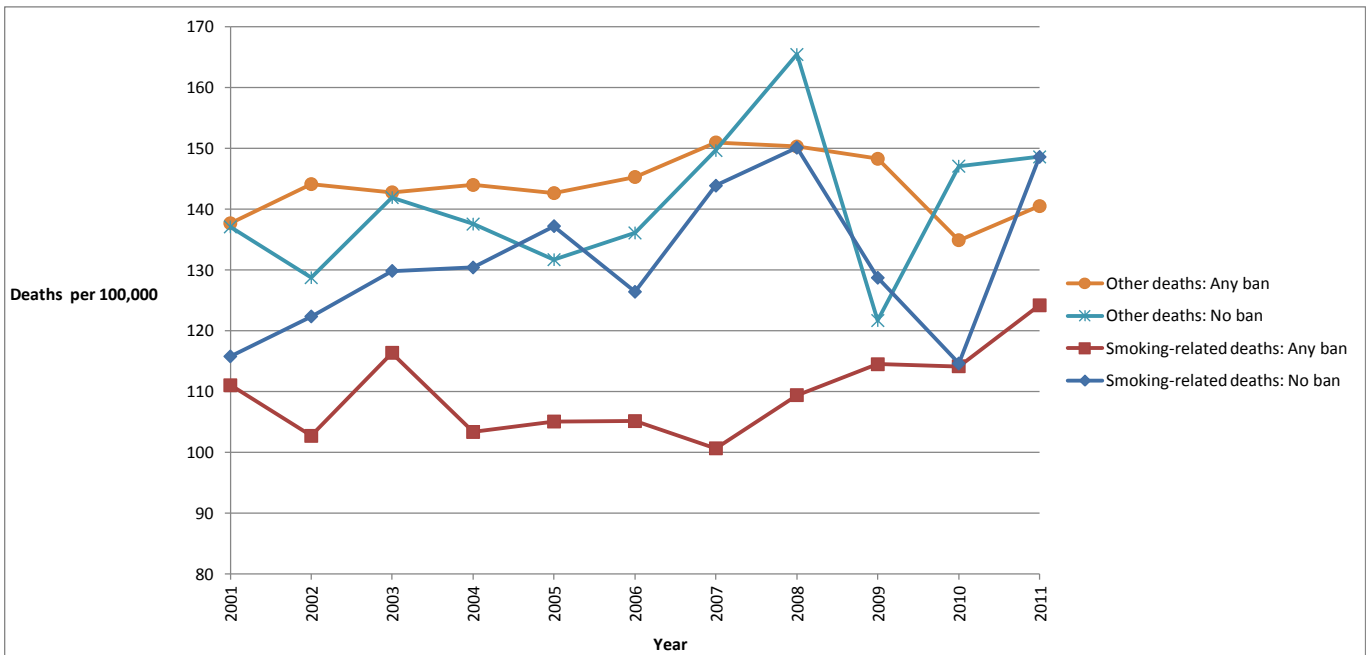

Supplement: bini017587.ww2_default.pdf [file bini017587.ww2_default.pdf]
